# Supplementary material for: Design and photovoltaic studies of W@TiO2/rGO nanocomposites with polymer gel electrolyte
Source: Royal Society of Chemistry journal article supplement (doi:10.1039/d3nj04205g), 2023-01-01
Supplement: d3nj04205g1.pdf [file d3nj04205g1.pdf]

## Supporting Information

### Designing and photovoltaic studies of W@TiO<sub>2</sub>/rGO Nanocomposites with Polymer Gel Electrolyte

Prakash S. Pawar<sup>a,b</sup>, Pramod A. Koyale<sup>a</sup>, Vijay S. Ghodake<sup>a,c</sup>, Swapnajit V. Mulik<sup>a</sup>, Navaj B. Mullani<sup>e,f</sup>, Yash G. Kapdi<sup>d</sup>, Saurabh S. Soni<sup>d</sup>, Sagar D. Delekar<sup>a,\*</sup>

<sup>a</sup>Nanoscience Research Laboratory, Department of Chemistry, Shivaji University, Kolhapur 416 004, Maharashtra, India

<sup>b</sup>Department of Chemistry, Shri Yashwantaro Patil Science College Solankur, Kolhapur, 416 212, Maharashtra, India

<sup>c</sup>Department of Chemistry, Yashwantrao Chavan Mahavidyalaya, Halkarni, Kolhapur, 416552, Maharashtra, India

<sup>d</sup>Department of Chemistry, Sardar Patel University, Vallabh Vidyanagar, 388120, Gujarat, India

<sup>e</sup>Research Institute for Green Energy Convergence Technology, Gyeongsang National University, Jinju 52828, Rep. of Korea

<sup>f</sup>Department of Materials Science & Convergence Technology, Gyeongsang National University, Jinju 52828- Rep. of Korea

\*Corresponding author:

Prof. (Dr.) Sagar D. Delekar

E-mail: [sdd\\_chem@unishivaji.ac.in](mailto:sdd_chem@unishivaji.ac.in)

(Tel.: +91-231-2609311, Fax: +91-231-2692333)

### **Synthesis of Graphene Oxide (GO)**

The modified Hummers method was used for the synthesis of graphene oxide (GO)<sup>1</sup>. Initially, 2 g of graphite powder was dissolved in a 9:1 equimolar proportion of H<sub>2</sub>SO<sub>4</sub> and H<sub>3</sub>PO<sub>4</sub> under stirring followed by an addition of some quantity of potassium permanganate. Then the mixture was continuously stirred for 8 hours until the color of suspension turned to slightly green. Further excess amount of KMnO<sub>4</sub> with 30% hydrogen peroxide (H<sub>2</sub>O<sub>2</sub>) was added gradually under stirring. The said mixture was acidified with dilute hydrochloric acid. Thereafter, the mixture was centrifuged up to 5000 rpm for 30 minutes. The supernatant was discharged followed by washing with an excess quantity of dilute HCl and double-distilled water (DDW). Finally, graphene oxide was desiccated overnight at around 100°C to obtain the GO powder.

### **Synthesis of Reduced Graphene Oxide (rGO)**

100 mg of GO was placed in a round-bottom flask with an equivalent quantity of water to produce a yellow–brown dispersion. The solution was thoroughly sonicated with a bath sonicator until it was clean and no particle matter was visible. Then solution was heated in an oil bath at 120 °C with addition of 1 mL of hydrazine hydrate and NaBH<sub>4</sub> under continuous stirring. The solution was kept for 24 hours; in addition to that, the entire setup was maintained cold by a water-cooled condenser. The GO slowly turned into a black precipitate. After that, it was rinsed in water as well as ethanol and then dried to form a powder<sup>2</sup>.

### **Synthesis of TiO<sub>2</sub> NPs**

TiO<sub>2</sub> NPs were synthesized via sonochemical assisted sol-gel technique, which is reported previously by our research group<sup>3</sup>. Initially, 5 mL of titanium tetraisopropoxide [Ti (OCH (CH<sub>3</sub>)<sub>2</sub>)<sub>4</sub>] (IV) was added in 5 mL of glacial acetic acid with constant stirring to form a clear solution. To avoid the agglomeration, 0.2 gm of sodium dodecyl sulfide (NaC<sub>12</sub>H<sub>25</sub>SO<sub>4</sub>) was added to above clear solution followed by the addition of 100 mL distilled water (DW) with constant stirring for 3 hours at 60°C. Thereafter, the whole solution was hydrolysed with dropwise addition of 2 M NH<sub>3</sub> up to a pH of 10.00 for complete hydroxylation to form Ti (OH)<sub>2</sub>. The above solution of Ti (OH)<sub>2</sub> was heated to 60°C with constant stirring for 3 hours. Afterward, the solution was cooled and centrifuged followed by washing with DW. Final white colored powder of TiO<sub>2</sub> NPs was obtained after calcination at 450°C for 2 hours.

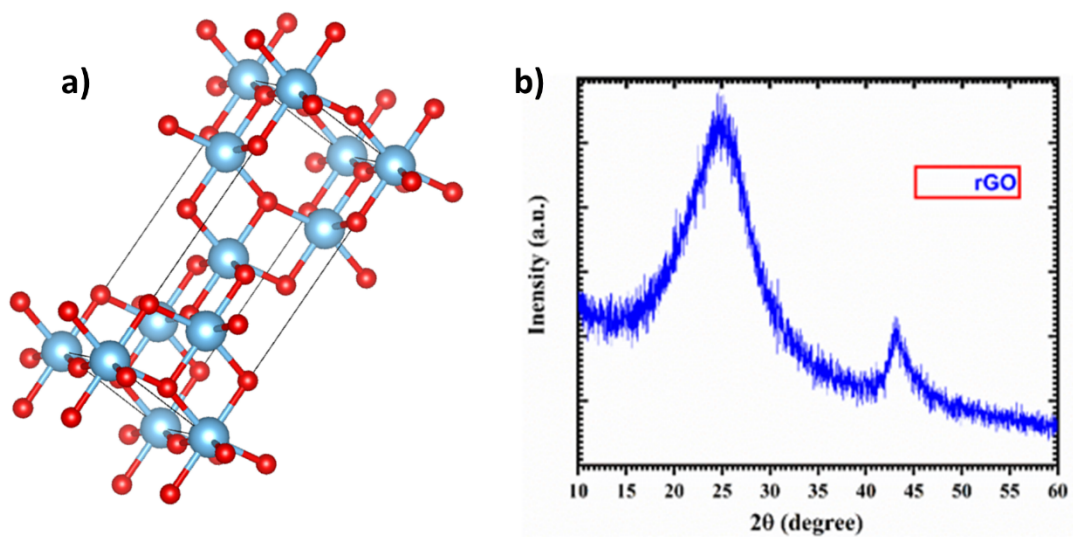

**Figure S1.** a) Crystal lattice structure of anatase TiO<sub>2</sub> and b) XRD pattern of rGO.

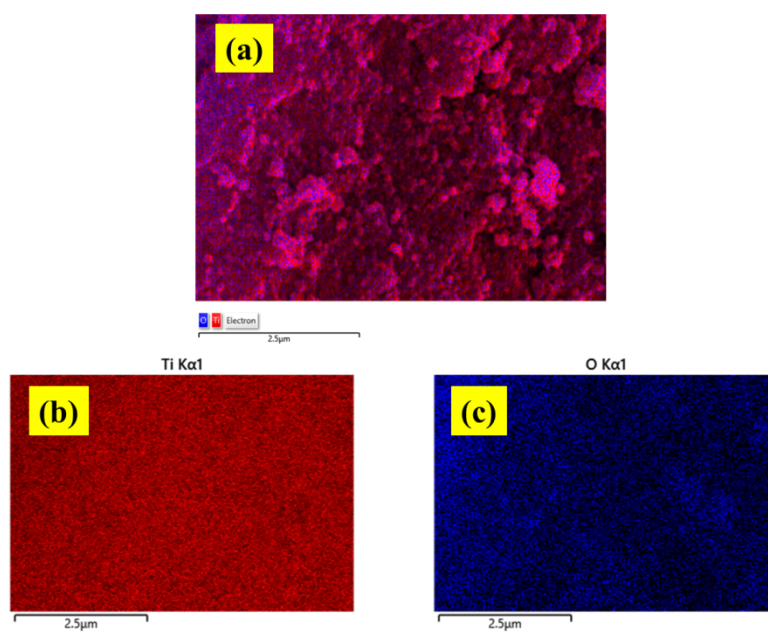

**Figure S2.** a) Elemental mapping images of TiO<sub>2</sub> NPs, (b) and (c) representing elemental composition of Ti and O with scale bar.

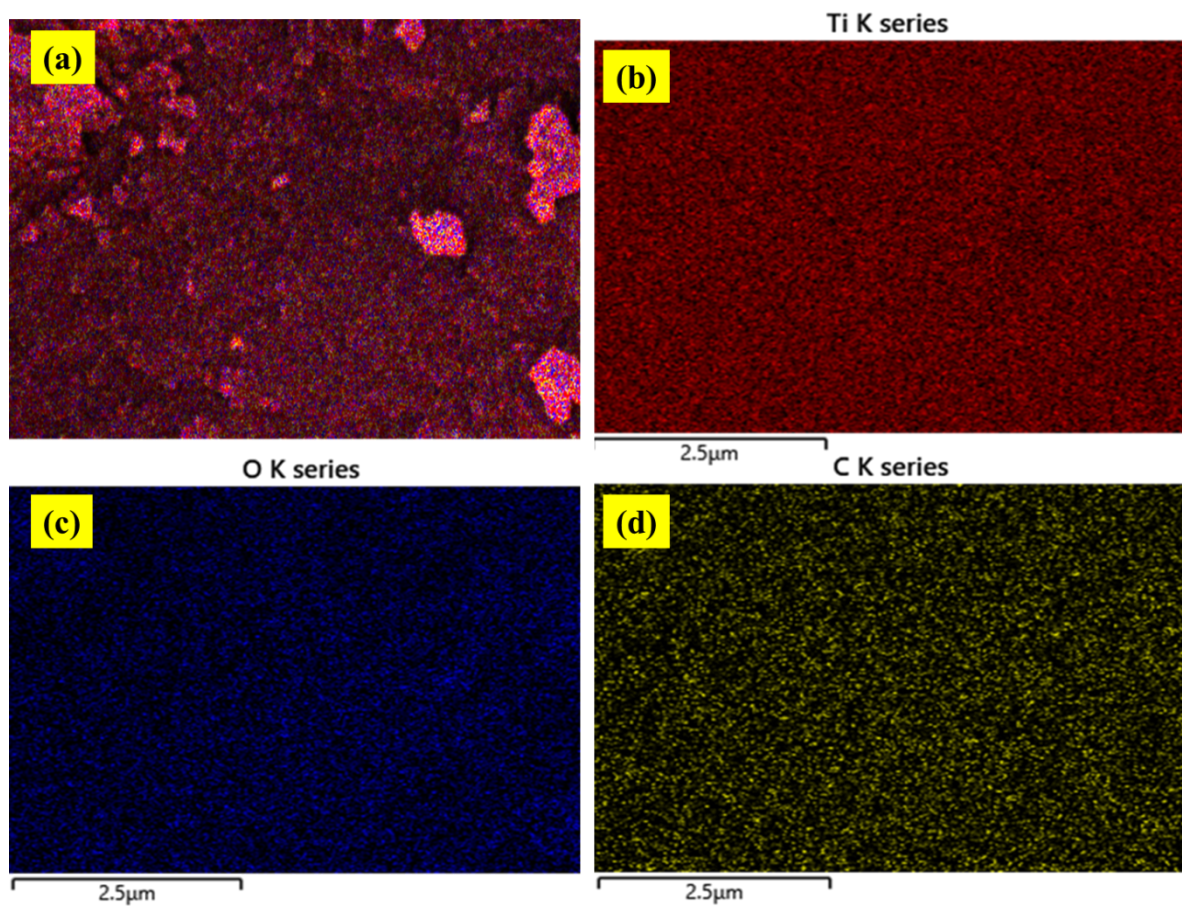

**Figure S3.** a) Elemental mapping images of TR NCs representing elemental Ti (b), O (c), and C (d).

**Table S1.** Elemental composition in WR-2 NCs analyzed by XPS data

| Element | Atomic (%) |
|---------|------------|
| Ti      | 27.69      |
| O       | 48.3       |
| C       | 23.91      |
| W       | 0.1        |

**Table S2.** Demonstrates the comparison of present work with previously reported some research undertakings

| Sr. No.   | Photoanode materials           | Sensitizer       | $J_{sc}$ (mA/cm <sup>2</sup> ) | $V_{oc}$ (mV) | FF (%)       | $\eta$ (%)  | Ref.                |
|-----------|--------------------------------|------------------|--------------------------------|---------------|--------------|-------------|---------------------|
| 1         | TiO <sub>2</sub>               | N719 dye         | 6.571                          | 450           | 45.72        | 1.35        | 4                   |
| 2         | TiO <sub>2</sub>               | N719 dye         | 07.221                         | 450           | 46.91        | 1.52        | 5                   |
| 3         | TiO <sub>2</sub>               | N719 Dye         | 07.37                          | 0.330         | 43.77        | 1.04        | 3                   |
| 4         | TiO <sub>2</sub>               | N3 dye           | 5.921                          | 430           | 44.03        | 1.12        | 4                   |
| 5         | TiO <sub>2</sub>               | N3 dye           | 1.53                           | 687           | 0.67         | 2.36        | 6                   |
| 6         | Nb <sub>2</sub> O <sub>5</sub> | N3 dye           | 0.74                           | 650           | 0.31         | 0.50        | 7                   |
| 7         | ZnO                            | N3 dye           | 1.40                           | 470           | 0.49         | 0.32        | 8                   |
| 8         | ZnO                            | Rose Bengal      | 4.04                           | 500           | 0.51         | 1.03        | 9                   |
| 9         | TiO <sub>2</sub>               | Spinach oleracea | 1.11                           | 583           | 0.46         | 0.29        | 10                  |
| 10        | TiO <sub>2</sub>               | Rose Bengal      | 0.12                           | 370           | 0.46         | 0.03        | 11                  |
| 11        | TiO <sub>2</sub>               | RuPc Dye         | 0.46                           | 0.300         | 57.49        | 0.07        | 3                   |
| 12        | TiO <sub>2</sub> /MWCNTs       | RuPc Dye         | 6.73                           | 0.580         | 53.24        | 2.07        | 3                   |
| <b>13</b> | <b>TiO<sub>2</sub></b>         | <b>SK3 dye</b>   | <b>2.45</b>                    | <b>0.76</b>   | <b>76.79</b> | <b>1.43</b> | <b>Present work</b> |
| <b>14</b> | <b>TiO<sub>2</sub>/rGO</b>     | <b>SK3 dye</b>   | <b>4.20</b>                    | <b>0.72</b>   | <b>76.65</b> | <b>2.31</b> | <b>Present work</b> |
| <b>15</b> | <b>W@TiO<sub>2</sub>/rGO</b>   | <b>SK3 dye</b>   | <b>13.1</b>                    | <b>0.80</b>   | <b>65.60</b> | <b>6.87</b> | <b>Present work</b> |

#### References:

- 1 J. Chen, B. Yao, C. Li and G. Shi, *Carbon N. Y.*, 2013, **64**, 225–229.
- 2 K. Prabakaran, P. J. Jandas, S. Mohanty and S. K. Nayak, *Sol. Energy*, 2018, **170**, 442–453.
- 3 S. D. Delekar, A. G. Dhodamani, K. V More, T. D. Dongale, R. K. Kamat, S. F. A. Acquah, N. S. Dalal and D. K. Panda, *ACS omega*, 2018, **3**, 2743–2756.
- 4 A. G. Dhodamani, K. V More, V. B. Koli, A. R. Shelke, N. G. Deshpande, D. K. Panda and S. D. Delekar, *ChemistrySelect*, 2019, **4**, 1055–1068.
- 5 A. G. Dhodamani, K. V More, S. M. Patil, A. R. Shelke, S. K. Shinde, D.-Y. Kim and S. D. Delekar, *Sol. Energy*, 2020, **201**, 398–408.
- 6 S. S. Mali, C. A. Betty, P. N. Bhosale and P. S. Patil, *Electrochim. Acta*, 2012, **59**, 113–120.
- 7 N. I. Beedri, P. K. Baviskar, V. P. Bhalekar, C. V Jagtap, A. M. Asiri, S. R. Jadkar and H. M. Pathan, *Phys. status solidi*, 2018, **215**, 1800236.
- 8 G. Koo, W. Lee, B. Kil, H. Ahn, B. W. Cho and S.-H. Han, *J. Nanosci. Nanotechnol.*, 2011, **11**, 4476–4479.
- 9 S. S. Khadtare and H. M. Pathan, *J. Renew. Sustain. Energy*.
- 10 G. Richhariya, A. Kumar, P. Tekasakul and B. Gupta, *Renew. Sustain. Energy Rev.*, 2017, **69**, 705–718.
- 11 M. A. Waghmare, N. I. Beedri, P. K. Baviskar, H. M. Pathan and A. U. Ubale, *J. Mater. Sci. Mater. Electron.*, 2019, **30**, 6015–6022.
